# Supplementary material
Source: Springer Nature journal article supplement (https://www.springermedizin.de/resource/supplementary/12879_2007_629_MOESM1_ESM.pdf/9449378)

(A)

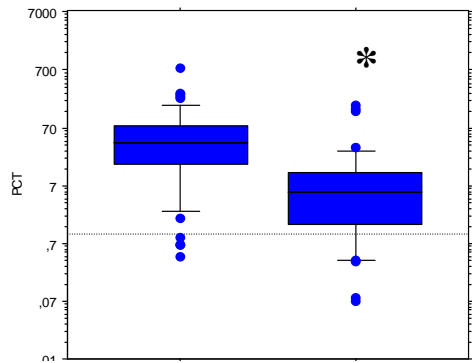

(B)

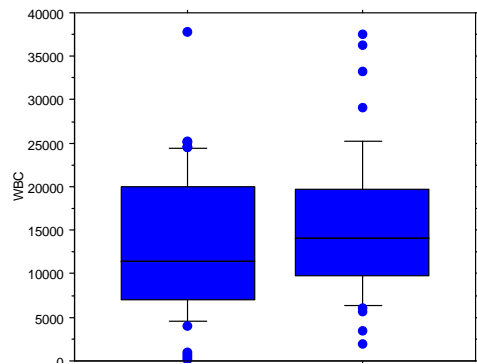

(C)

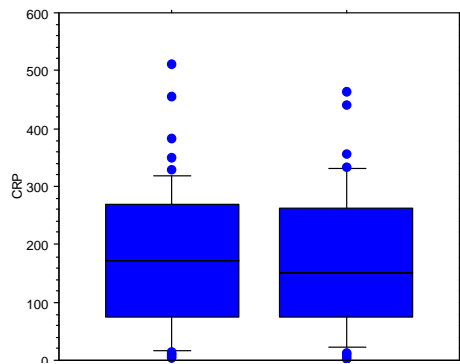

Supplement: MOESM1 [file 9449378]
